# Supplementary material
Source: publisher figshare collection journal article supplement (https://frontiersin.figshare.com/ndownloader/files/27974949)
Supplement: Supplementary file [file 27974949]

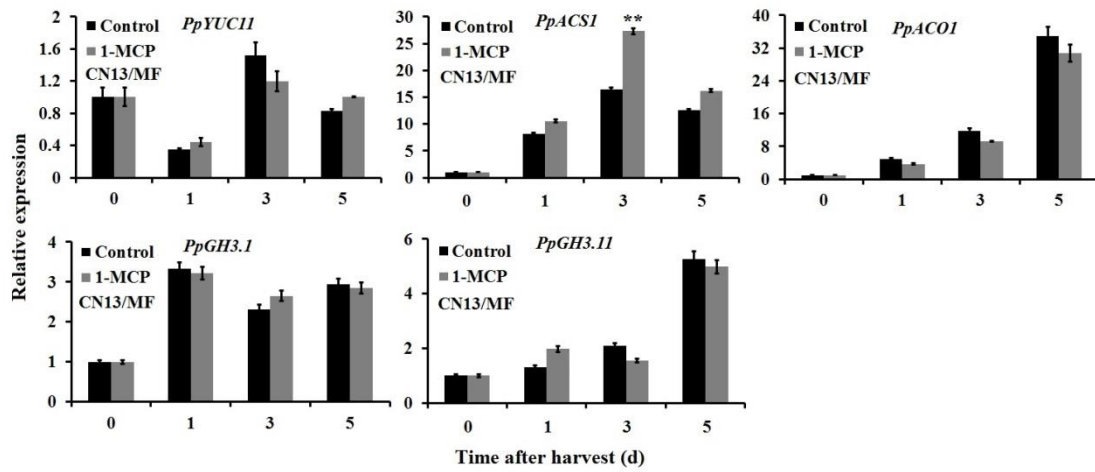

Fig. S6. The expression profile of *PpYUC11*, *PpACSI*, *PpACO1*, *PpGH3.1* and *PpGH3.11* in 'CN13' after treated with 1-MCP.
